# Supplementary material for: Engineered human sialidase as a novel cancer therapeutic targeting immune-suppressive sialoglycans in tumors
Source: Research Square preprint supplement (doi:10.21203/rs.3.rs-6667049/v1), 2025-06-25
Supplement: Supplementary file 1 [file 7e8483daca57a5d3775d705f.pdf]

**Supp Figure 1. N-terminal substitutions and impacts on enzyme activity and expression**

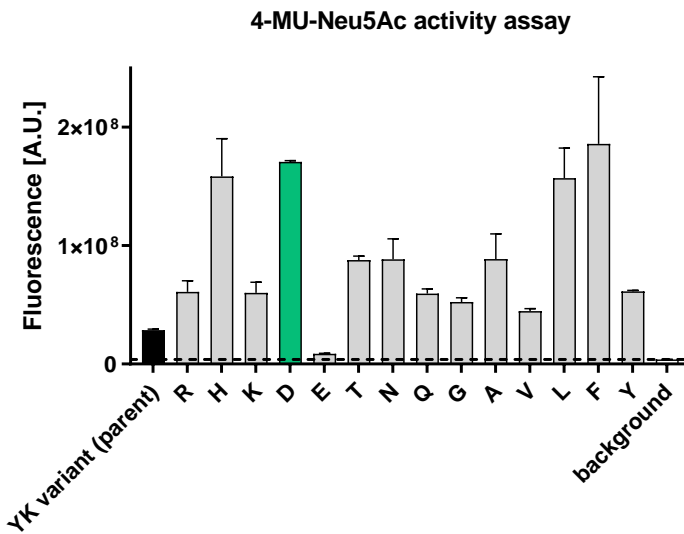

| N-terminal substitution | Protein-A yield (mg/L) | Mean enzyme activity (RFU) |
|-------------------------|------------------------|----------------------------|
| Parent                  | 17.3                   | 2.87E+07                   |
| R                       | 10.3                   | 6.09E+07                   |
| H                       | 3.0                    | 1.58E+08                   |
| K                       | 10.0                   | 6.02E+07                   |
| <b>D</b>                | <b>6.3</b>             | <b>1.71E+08</b>            |
| E                       | 6.7                    | 8.56E+06                   |
| S                       | -                      | -                          |
| T                       | 4.7                    | 8.79E+07                   |
| N                       | 6.0                    | 8.85E+07                   |
| Q                       | 4.3                    | 5.95E+07                   |
| G                       | 6.7                    | 5.23E+07                   |
| P                       | -                      | -                          |
| A                       | 7.7                    | 8.87E+07                   |
| V                       | 8.7                    | 4.46E+07                   |
| L                       | 5.3                    | 1.57E+08                   |
| F                       | 3.3                    | 1.86E+08                   |
| Y                       | 0.7                    | 6.13E+07                   |

Top panel: Enzyme activity as measured by 4-MU-Neu5Ac substrate, using 0.5mM of substrate, and 2µg of each Neu2 variant per reaction. All variants were designed on parental Neu2 backbone with V6Y and I187K mutations “parent”. Bottom table: Comparison of Protein-A expression yields of variants, N-terminal substitution of “D” achieved high enzyme activity, with moderately reduced expression yield.

**Supp Figure 2. SEC-HPLC comparison of V6Y variant with Neu2 wildtype**

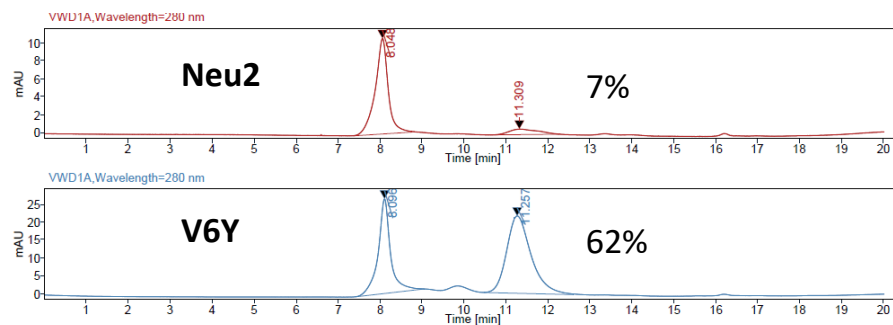

SEC-HPLC chromatograms for Neu2 wildtype (Neu2-Fc) vs. Neu2 variant with V6Y mutation. Proteins were purified by 1-step Protein-A purification and analyzed on Superose 6 Increase 10/300 GL column (Cytiva). Estimated monomer percentages are indicated. Protein-A expression yield of Neu2 wildtype: 0.3mg/L. Protein-A expression yield of V6Y variant: 3.3mg/L.
